# Supplementary material for: Parkinson’s disease patients benefit from bicycling - a systematic review and meta-analysis
Source: PubMed Central journal article supplement (PMC8463550; doi:10.1038/s41531-021-00222-6), 2021-09-24
Supplement: 41531_2021_222_MOESM1_ESM.pdf [file 41531_2021_222_MOESM1_ESM.pdf]

## Supplementary Material

**Supplementary Material: Table 1 (page 2).** Quality Assessment Criteria

**Supplementary Material: Table 2 (page 3).** Quality Assessment Score

**Supplementary Material: Table 3 (page 4).** Non-significant secondary measure results

**Supplementary Material: Table 4 (page 4).** Non-significant secondary measure studies

**Supplementary Material: Table 5 (page 5).** Intervention details

**Supplementary Material: Table 6 (page 9).** Study details and measures

**Table 1**

***Quality Assessment Criteria***

---

|     |                                                                                                                                                |
|-----|------------------------------------------------------------------------------------------------------------------------------------------------|
| 1.  | Question / objective sufficiently described?                                                                                                   |
| 2.  | Study design evident and appropriate?                                                                                                          |
| 3.  | Method of subject/comparison group selection or source of information/input variables described and appropriate?                               |
| 4.  | Subject (and comparison group, if applicable) characteristics sufficiently described?                                                          |
| 5.  | If interventional and random allocation was possible, was it described?                                                                        |
| 6.  | If interventional and blinding of investigators was possible, was it reported?                                                                 |
| 7.  | If interventional and blinding of subjects was possible, was it reported?                                                                      |
| 8.  | Outcome and (if applicable) exposure measure(s) well defined and robust to measurement / misclassification bias? means of assessment reported? |
| 9.  | Sample size appropriate?                                                                                                                       |
| 10. | Analytic methods described/justified and appropriate?                                                                                          |
| 11. | Some estimate of variance is reported for the main results?                                                                                    |
| 12. | Controlled for confounding?                                                                                                                    |
| 13. | Results reported in sufficient detail?                                                                                                         |
| 14. | Conclusions supported by the results?                                                                                                          |

---

**Table 1. Quality assessment criteria for quantitative studies. <sup>1</sup>**

Each item could be answered with *Yes, No, Partially, or Not applicable*. The overall score is a sum of the items, each answer having a certain weight.

**Table 2**

***Overall quality score***

| <b>Author</b>                         | <b>Reviewer I</b> | <b>Reviewer II</b> | <b>Mean</b> |
|---------------------------------------|-------------------|--------------------|-------------|
| Arcolin et al., 2016 <sup>2</sup>     | 0.93              | 0.96               | 0.95        |
| Chang et al., 2018 <sup>3</sup>       | 0.86              | 0.86               | 0.86        |
| Corbett et al., 2013 <sup>4</sup>     | 0.86              | 0.69               | 0.78        |
| Demonceau et al., 2016 <sup>5</sup>   | 0.73              | 0.85               | 0.79        |
| Duchesne et al., 2015 <sup>6</sup>    | 0.88              | 0.95               | 0.92        |
| Ferraz et al., 2018 <sup>7</sup>      | 0.92              | 0.88               | 0.9         |
| Fiorelli et al., 2019 <sup>8</sup>    | 0.81              | 0.83               | 0.82        |
| Harper et al., 2019 <sup>9</sup>      | 0.69              | 0.86               | 0.76        |
| Hazamy et al., 2017 <sup>10</sup>     | 0.79              | 0.69               | 0.74        |
| McGough et al., 2016 <sup>11</sup>    | 0.77              | 0.77               | 0.77        |
| Nadeau et al., 2017 <sup>12</sup>     | 0.71              | 0.91               | 0.81        |
| Nadeua et al., 2018 <sup>13</sup>     | 0.75              | 0.95               | 0.85        |
| Peacock et al., 2014 <sup>14</sup>    | 0.79              | 0.82               | 0.81        |
| Qutubuddin et al., 2013 <sup>15</sup> | 0.88              | 0.81               | 0.85        |
| Ridgel et al., 2011a <sup>16</sup>    | 0.73              | 0.73               | 0.73        |
| Ridgel et al., 2011b <sup>17</sup>    | 0.79              | 0.83               | 0.81        |
| Ridgel et al., 2012 <sup>18</sup>     | 0.71              | 0.73               | 0.72        |
| Steib et al., 2018 <sup>19</sup>      | 0.71              | 0.82               | 0.77        |
| Tabak et al., 2013 <sup>20</sup>      | 0.7               | 0.72               | 0.71        |
| Tollár et al., 2019 <sup>21</sup>     | 0.96              | 0.96               | 0.96        |
| Uygur et al., 2015 <sup>22</sup>      | 0.79              | 0.75               | 0.77        |
| Uygur et al., 2017 <sup>23</sup>      | 0.65              | 0.64               | 0.65        |

**Table 2: Scores from both reviewers and an average of the two means.**

**Table 3**

***Non-significant secondary measure results***

| Measure         | N | SMD    | 95% CI        | t    | p      | I <sup>2</sup> % | Removed studies |
|-----------------|---|--------|---------------|------|--------|------------------|-----------------|
| Cadence         | 6 | 0.6047 | [0.00, 1.21]  | 2.59 | 0.0491 | 60.5             | Nadeau 2017     |
|                 | 5 | 0.4270 | [-0.09, 0.94] | 2.29 | 0.0838 | 24.3             |                 |
| Step length     | 5 | 0.1548 | [-0.08, 0.39] | 1.85 | 0.1379 | 0.00             |                 |
| Bradykinesia    | 4 | 1.3    | [-0.45, 3.04] | 2.37 | 0.0985 | 73.0             |                 |
| Tremor          | 4 | 0.18   | [-0.14, 0.51] | 1.77 | 0.1746 | 0.00             |                 |
| UPDRS II-III    | 6 | 0.55   | [-0.06, 1.17] | 2.31 | 0.0689 | 63.3             | Tollár 2019     |
|                 | 5 | 0.37   | [-0.23, 0.98] | 1.7  | 0.16   | 37.3             |                 |
| Quality-of-life | 8 | 0.23   | [-0.14, 0.60] | 1.46 | 0.1883 | 25.7             |                 |

**Table 3:** The table shows the non-significant effect sizes of the secondary outcome measures.

Measure = Outcome measure, N = Number of included studies, SMD = Standardized mean difference, 95% CI = 95% confidence interval, t = t-statistics, p = probability of the detected effect size, I<sup>2</sup> % = A percentage estimate of the variability not caused by the sampling error.

The column *Removed studies* indicates the studies that were detected as outliers based on the sensitivity analysis contributing with large effect size and / or heterogeneity, and thus removed from the final pooling. In the table, the effect size measure on the row below the removed study reports the final effect size of the corresponding measure, without the removed study.

**Table 4**

***Non-significant secondary measure studies***

| Measure         | Studies     |             |              |                 |                |                 |             |            |
|-----------------|-------------|-------------|--------------|-----------------|----------------|-----------------|-------------|------------|
| Gait cadence    | Nadeau 2017 | Chang 2018  | McGough 2016 | Uygur 2017      | Arcolin 2016   | Demonceau 2016  |             |            |
| Step length     | Nadeau 2017 | Chang 2018  | McGough 2016 | Arcolin 2016    | Demonceau 2016 |                 |             |            |
| Bradykinesia    | Uygur 2017  | Chang 2018  | Ridgel 2011a | Ridgel 2012     |                |                 |             |            |
| Tremor          | Nadeau 2019 | Chang 2018  | Ridgel 2011a | Ridgel 2012     |                |                 |             |            |
| UPDRS II - III  | Tollár 2019 | Nadeau 2019 | Chang 2018   | Uygur 2017      | Arcolin 2016   | Qutubuddin 2013 |             |            |
| Quality of life | Tollár 2019 | Nadeau 2019 | Uygur 2017   | Qutubuddin 2013 | Demonceau 2016 | Ferraz 2018     | Harper 2019 | Tabak 2013 |

**Table 4:** The Table contains the studies that were included into the initial analysis of the above presented non-significant secondary measures.

**Table 5**

***Intervention details***

| First author           | Intervention      | Design    | Recruitment                      | Setting                         | Treatment provider                      | Attrition | Session duration (min) | Sessions / week | Overall duration (days) | Assisted | RPM | RPE      | Heart rate |
|------------------------|-------------------|-----------|----------------------------------|---------------------------------|-----------------------------------------|-----------|------------------------|-----------------|-------------------------|----------|-----|----------|------------|
| <b>Arcolin 2016</b>    | Ergometer         | RCT Pilot | Neurorehab. Center               | Rehab. Center Laboratory        | NA                                      | 0         | 30                     | 5               | 21                      | No       | 60  | 11 to 14 | NA         |
| <b>Demonceau 2016</b>  | Ergometer         | RCT *     | Movm. Dis. Clinic                | Hospital Laboratory             | Physiotherapist & Students              | 6         | 75                     | 2.5             | 84                      | No       | NA  | 12.3     | Monit.     |
| <b>Ferraz 2018</b>     | Ergometer         | RCT Pilot | Outpatient Clinic                | Outpatient Clinic               | Physiotherapist                         | 10        | 50                     | 3               | 56                      | No       | NA  | 15       | 50 - 75 %  |
| <b>Harper 2019</b>     | Ergometer         | RCT *     | NA                               | Laboratory                      | NA                                      | 2         | 40                     | 2               | 1                       | Yes      | 78  | 11.2     | 88.4       |
| <b>Qutubuddin 2013</b> | Bicycle           | RCT       | Hospital advert                  | Medical Center                  | Neuropsychologist, assistant evaluators | 14        | 30                     | 2               | 56                      | Yes      | NA  | NA       | NA         |
| <b>Ridgel 2011a</b>    | Bicycle           | RCT       | Support group, Neurology clinics | Laboratory                      | Laboratory assistant                    | 0         | 30                     | 1               | 21                      | Yes      | 70  | 6 to 8   | 73         |
| <b>Tollár 2019</b>     | Ergometer         | RCT       | Database                         | Outpatient Physiotherapy Clinic | Physical therapists                     | 0         | 60                     | 5               | 35                      | No       | NA  | 13.6     | 119.5 bpm  |
| <b>Chang 2018</b>      | Bicycle           | RD        | NA                               | NA                              | Trainer                                 | 0         | 35                     | 2               | 56                      | No       | 40  | Monit.   | 50 - 55 %  |
| <b>Corbett 2013</b>    | Recumbent Bicycle | RD        | Support group, Neurology clinics | NA                              | NA                                      | 1         | 30                     | 1               | 1                       | Yes      | 80  | NA       | 60 - 70 %  |
| <b>Duchesne 2015</b>   | Recumbent bicycle | RD, HC    | NA                               | NA                              | Kinesiologist                           | 0         | 30                     | 3               | 21                      | No       | 60  | Monit.   | 60 - 80 %  |

|                      |                |             |                                                     |                                |                                    |   |    |   |    |     |       |          |               |
|----------------------|----------------|-------------|-----------------------------------------------------|--------------------------------|------------------------------------|---|----|---|----|-----|-------|----------|---------------|
| <b>Fiorelli 2019</b> | Bicycle        | RD          | Hospital PD group                                   | NA                             | NA                                 | 2 | 30 | 1 | 1  | No  | 50-60 | 15 to 17 | NA            |
| <b>Hazamy 2017</b>   | Bicycle        | RD, HC      | Center for Mov. Dis., Database, Word of mouth       | NA                             | NA                                 | 0 | 5  | 1 | 1  | No  | Comf. | NA       | Monit.        |
| <b>McGough 2016</b>  | Tandem bicycle | RD          | Newsletter, PD registry, Activity groups            | NA                             | Class instructor & Tandem partners | 3 | 60 | 3 | 70 | Yes | 85    | Monit.   | Monit.        |
| <b>Nadeau 2017</b>   | Bicycle        | RD, HC      | NA                                                  | NA                             | Kinesiologist                      | 3 | 30 | 3 | 84 | No  | 60    | Monit.   | Max 80 %      |
| <b>Nadeau 2019</b>   | Bicycle        | RD, HC      | NA                                                  | NA                             | Kinesiologist                      | 3 | 40 | 3 | 84 | No  | 60    | Monit.   | NA            |
| <b>Peacock 2014</b>  | Ergometer      | RD, HC      | Local community, Support group                      | Exercise physiology laboratory | Certified personal trainer         | 2 | 30 | 3 | 56 | Yes | 80    | 11 to 16 | 110 - 160 bpm |
| <b>Ridgel 2011b</b>  | Ergometer      | RD          | NA                                                  | NA                             | NA                                 | 0 | 40 | 1 | 21 | Yes | 80    | 6 to 8   | 73 bpm        |
| <b>Ridgel 2012</b>   | Ergometer      | RD Pilot    | NA                                                  | NA                             | Laboratory assistant               | 0 | 40 | 1 | 1  | Yes | 80    | 13.3     | 98 bpm        |
| <b>Steib 2018</b>    | Ergometer      | RD          | NA                                                  | NA                             | Exercise therapist                 | 0 | 30 | 1 | 1  | No  | 70    | 6 to 20  | 60 - 70 %     |
| <b>Tabak 2013</b>    | Bicycle        | Case-series | Movm. Dis. Clinic, Support groups, PD organisations | NA                             | Researchers                        | 0 | 40 | 3 | 56 | No  | 69    | Monit.   | 97 bpm        |

|                       |                      |    |               |    |                        |   |    |   |    |     |    |      |        |
|-----------------------|----------------------|----|---------------|----|------------------------|---|----|---|----|-----|----|------|--------|
| <b>Uygun<br/>2015</b> | Recumbent<br>bicycle | RD | NA            | NA | NA                     | 0 | 30 | 1 | 1  | Yes | 99 | NA   | Monit. |
| <b>Uygun<br/>2017</b> | Recumbent<br>bicycle | RD | Support group | NA | Experienced<br>trainer | 0 | 30 | 2 | 42 | Yes | NA | 13.7 | Monit. |

**Table 5: Intervention details**

The column *Intervention* tells which type of bicycle was used to deliver the intervention.

The column *design* tells the design of each study: *RCT* = randomized control trial, *RCT\** = pseudo randomized or study applied the same inclusion and exclusion criteria to both groups but recruited them separately, *RD* = repeated design, *HC* = healthy controls.

The column *assisted* tells whether the bicycling intervention was assisted, e.g. by an ergometer motor.

*RPM* = Rounds per minute, cadence.

*RPE* = Rate of perceived exertion, reports the subjective rating of the experienced effort during the exercise based on the Borg Scale.

The column *Heart Rate* shows whether the heart rate was only monitored during the test, or if it was measured, it is reported either as a percentage of maximum capacity (%), or as an average of beats per minute (bpm).

*NA* means that no data was available



**Table 6**

***Study details and measures***

| Author            | Year  | Journal                         | Country | Used test, scale or questionnaire                                                                                                                                                                   | Outcome measure                                                                                                                               |
|-------------------|-------|---------------------------------|---------|-----------------------------------------------------------------------------------------------------------------------------------------------------------------------------------------------------|-----------------------------------------------------------------------------------------------------------------------------------------------|
| <b>Arcolin</b>    | 2016  | Restor Neurol Neurosci          | Italy   | 6-MWT, W. capacity<br>Gait speed (cm / s)<br>Step length (cm)<br>Cadence (Steps / min)<br>TUG-test<br>Mini-BesTest<br>MDS-UPDRS motor                                                               | PM (Motor), Physical functioning, 6-MWT<br>Gait speed<br>Step length<br>Gait cadence<br>Balance<br>Physical functioning<br>MDS-UPDRS II - III |
| <b>Demonceau</b>  | 2016  | Eur J Phys Rehabil Med          | Belgium | Peak torq. knee extension<br>Peak work load (Strength)<br>Speed (Time to cover 30 meters)<br>Stride length (Speed / Cadence)<br>Cadence (Trunk accelerometer)<br>6-MWT, W. capacity<br>PDQ-39 Total | Physical functioning<br>PM (Motor)<br>Gait speed<br>Step length<br>Gait cadence<br>6-MWT<br>PDQ-39, Quality of life                           |
| <b>Ferraz</b>     | 2018  | Arch Phys Med Rehabil           | Brazil  | 6-MWT, W. capacity<br>10-Meter walk test<br>PDQ-39 Total<br>WHODAS 2.0 (Disability)                                                                                                                 | PM (Motor), Physical functioning, 6-MWT<br>Gait speed<br>PDQ-39<br>Quality of life                                                            |
| <b>Harper</b>     | 2019  | Int J Environ Res Public Health | USA     | WebNeuro (Executive function)<br>BDI-II (Depression, Wellbeing)                                                                                                                                     | PM (Cognition)<br>Quality of life                                                                                                             |
| <b>Qutubuddin</b> |       | Rehabil Res Pract               | USA     | MDS-UPDRS-III<br>BBS<br>PDQ-39 total                                                                                                                                                                | PM, MDS-UPDRS II - III<br>Physical functioning, Balance<br>PDQ-39, Quality of life                                                            |
| <b>Ridgel</b>     | 2011a | Phys Sportsmed                  | USA     | Accelerometer, Gyroscope (Tremor)<br>Accelerometer, Gyroscope, Hand grasp (Bradykinesia)<br>Bradykinesia pronation / supination                                                                     | PM (Motor), Tremor<br>Bradykinesia<br>Physical functioning                                                                                    |
| <b>Tollar</b>     | 2019  | Gerontology                     | Hungary | MDS-UPDRS M-EDL (II)                                                                                                                                                                                | PM (Motor), MDS-UPDRS II - III                                                                                                                |

|                 |      |                     |        |                                                                                                                                                                                                                                                                                                                                                                                                                                                         |                                                                                                                                                                                                                                                                   |
|-----------------|------|---------------------|--------|---------------------------------------------------------------------------------------------------------------------------------------------------------------------------------------------------------------------------------------------------------------------------------------------------------------------------------------------------------------------------------------------------------------------------------------------------------|-------------------------------------------------------------------------------------------------------------------------------------------------------------------------------------------------------------------------------------------------------------------|
| <b>Chang</b>    | 2018 | J Clin Neurol       | Taiwan | PDQ-39 Mobility sub<br>EQ-5D-Questionnaire<br>BBS, Balance, falling<br>BESTest, Balance control<br>6-MWT, W. capacity<br>MDS-UPDRS III, Motor<br>MDS-UPDRS III, Tremor sub<br>MDS-UPDRS III, Akinesia sub<br>TUG-Test (Balance)<br>SE-ADL (Percentage of independence)<br>PDQ-39 total<br>Gait speed (cm / s)<br>Step length (cm)<br>Step time (s)<br>Double limb support time (s)<br>Range of movement, Hip, Mobility<br>Gait, Hip extension, Mobility | PDQ-39<br>Quality of life<br>Physical functioning<br>Balance<br>Gait speed<br>PM (Motor), MDS-UPDRS II - III<br>Tremor<br>Bradykinesia<br>Physical functioning<br>Quality of life<br>PDQ-39<br>Gait speed<br>Step length<br>Gait cadence<br>Balance<br>PM (Motor) |
| <b>Corbett</b>  | 2013 | NeuroRehabilitation | USA    | TMT A&B                                                                                                                                                                                                                                                                                                                                                                                                                                                 | PM (Motor)                                                                                                                                                                                                                                                        |
| <b>Duchesne</b> | 2015 | Brain Cogn          | Canada | Cognition, Execution, Executive, motor                                                                                                                                                                                                                                                                                                                                                                                                                  | PM (Cognition)                                                                                                                                                                                                                                                    |
| <b>Fiorelli</b> | 2019 | J Phys Act Health   | Brazil | Visual memory, execution, reaction time                                                                                                                                                                                                                                                                                                                                                                                                                 | PM (Cognition)                                                                                                                                                                                                                                                    |
| <b>Hazamy</b>   | 2017 | Brain Cogn          | USA    | BBS, Balance                                                                                                                                                                                                                                                                                                                                                                                                                                            | Physical functioning                                                                                                                                                                                                                                              |
| <b>McGough</b>  | 2016 | J Neurol Phys Ther  | USA    | FTSTS, Lower extremity, Balance                                                                                                                                                                                                                                                                                                                                                                                                                         | PM (Motor)                                                                                                                                                                                                                                                        |
|                 |      |                     |        | TUG, Balance                                                                                                                                                                                                                                                                                                                                                                                                                                            | Balance                                                                                                                                                                                                                                                           |
|                 |      |                     |        | Speed (m / s)                                                                                                                                                                                                                                                                                                                                                                                                                                           | Speed                                                                                                                                                                                                                                                             |
|                 |      |                     |        | Cadence (steps / min)                                                                                                                                                                                                                                                                                                                                                                                                                                   | Gait cadence                                                                                                                                                                                                                                                      |
|                 |      |                     |        | Stride length (m)                                                                                                                                                                                                                                                                                                                                                                                                                                       | Step length                                                                                                                                                                                                                                                       |
| <b>Nadeau</b>   | 2017 | Front Hum Neurosci  | Canada | Gait speed (m / s)                                                                                                                                                                                                                                                                                                                                                                                                                                      | PM (Motor), Speed                                                                                                                                                                                                                                                 |
|                 |      |                     |        | Cadence steps (steps / min)                                                                                                                                                                                                                                                                                                                                                                                                                             | Gait cadence                                                                                                                                                                                                                                                      |
|                 |      |                     |        | Step length (m)                                                                                                                                                                                                                                                                                                                                                                                                                                         | Physical functioning, Step length                                                                                                                                                                                                                                 |
|                 |      |                     |        | Single support time (s), Balance                                                                                                                                                                                                                                                                                                                                                                                                                        | Balance                                                                                                                                                                                                                                                           |

|                |       |                         |         |                                                                                                                        |                                                                                                                                 |
|----------------|-------|-------------------------|---------|------------------------------------------------------------------------------------------------------------------------|---------------------------------------------------------------------------------------------------------------------------------|
| <b>Nadeau</b>  | 2019  | Front Hum Neurosci      | USA     | MDS-UPDRS III sub, tremor<br>MDS-UPDRS III sub, rigidity<br>MDS-UPDRS III total subscore<br>Visuomotor (reaction time) | Tremor<br>Physical functioning<br>MDS-UPDRS II - III<br>PM (Cognition)                                                          |
| <b>Peacock</b> | 2014  | Aging Clin Exp Res      | USA     | Sit and reach, Flexibility<br>Leg press, Muscle strength                                                               | Physical functioning<br>PM (Motor)                                                                                              |
| <b>Ridgel</b>  | 2011b | J Aging Phys Act        | USA     | TMT-B                                                                                                                  | PM (Cognition)                                                                                                                  |
| <b>Ridgel</b>  | 2012  | Arch Phys Med Rehabil   | USA     | Tremor score, 3D Gyroscope<br>Bradykinesia, 3D Gyroscope                                                               | Tremor<br>PM (Motor), Bradykinesia                                                                                              |
| <b>Steib</b>   | 2018  | Front Aging Neurosci    | Germany | Time in balance                                                                                                        | PM (Motor), Physical functioning, Balance                                                                                       |
| <b>Tabak</b>   | 2013  | J Neurol Phys Ther      | USA     | PDCRS<br>PDQ-39 Total<br>Gait speed (m / s)<br>FGA, Balance, Stability                                                 | PM (Cognition)<br>PDQ-39, Quality of life<br>Speed<br>Physical functioning, Balance                                             |
| <b>Uygun</b>   | 2015  | Physiother Theory Pract | USA     | 4SST, Balance<br>TUG<br>10MW<br>9-HPT                                                                                  | PM (Motor)<br>Balance<br>Speed<br>Physical functioning                                                                          |
| <b>Uygun</b>   | 2017  | Physiother Theory Pract | USA     | MDS-UPDRS III<br>MDS-UPDRS Bradykinesia<br>H&Y Scale<br>SF36<br>10MW<br>Steps<br>TUG<br>4SST, Balance, Stability       | MDS-UPDRS II - III<br>Bradykinesia<br>PM (Motor)<br>Quality of life<br>Speed<br>Gait cadence<br>Physical functioning<br>Balance |

**Table 6: Study details and measures**

Column *Journal* = The journal name as abbreviated in the catalogue of the National Library of Medicine (NLM)

Column *Used test, scale or questionnaire* entails the abbreviations of the measures that were applied in the corresponding studies: 6-MWT = 6 Minute walk test; 10MWT = 10 Meter walk test; PDQ-39 = Parkinson's Disease Questionnaire; TUG-Test = Time Up and Go Test; Mini-BesTest = Mini Balance Evaluation Systems Test; WHODAS 2.0 = World Health Organisation Disability Assessment Schedule; TMT-B = Trail Making Test – B; WebNeuro = World-Wide-Web based neurocognitive assessment battery; BDI-II = Beck Depression Inventory II; MDS-UPDRS III = Movement Disorder Society-Sponsored; Revision of the Unified Parkinson's Disease Rating Scale III, Motor; BBS = Berg Balance Scale; MDS-UPDRS M-EDL II = Movement Disorder Society-Sponsored Revision of the Unified Parkinson's Disease Rating Scale, Motor Experience of Daily Living II; EQ-5D Euro Quality of Life 5-Dimensions; SE-ADL = Schwab and England Activities of Daily Living; FTSTS = Five Time Sit to Stand Test; PDCRS = Parkinson's Disease Cognitive Rating Scale; FGA = Functional Gait Assessment; 4SST = 4 Square Step Test; 9HPT = Nine Hole Peg Test; H&Y Scale = Hoehn and Yahr Scale; SF-36 = Short Form-36 Health Survey.

The column *Outcome measure* indicates how the corresponding measures was categorized for the analysis: PM (Motor) = Primary measure Motor; PM (Cognition) = Primary measure Cognition; 6-MWT = 6 Minute walk test; MDS-UPDRS III = Movement Disorder Society-Sponsored; Revision of the Unified Parkinson's Disease Rating Scale III; MDS-UPDRS M-EDL II = Movement Disorder Society-Sponsored Revision of the Unified Parkinson's Disease Rating Scale, Motor Experience of Daily Living II.

## References

1. Kmet, L. M., Lee, R. C. & Cook, L. S. Standard quality assessment criteria for. *HTA Initiat.* **13**, (2004).
2. Arcolin, I. *et al.* Intensive cycle ergometer training improves gait speed and endurance in patients with Parkinson's disease: A comparison with treadmill training. *Restor. Neurol. Neurosci.* **34**, 125–138 (2016).
3. Chang, H.-C. An 8-Week Low-Intensity Progressive Cycling Training. **14**, 225–233 (2018).
4. Corbett, D. B., Peer, K. S. & Ridgel, A. L. Biomechanical muscle stimulation and active-assisted cycling improves active range of motion in individuals with Parkinson's disease. *NeuroRehabilitation* **33**, 313–322 (2013).
5. Demonceau, M. *et al.* Effects of 12 weeks of aerobic or strength training in addition to standard care in Parkinson ' s disease : a controlled study . EUROPEAN JOURNAL OF PHYSICAL AND REHABILITATION Subscription : Information about subscribing to Minerva Medica journals is onl. (2016).
6. Duchesne, C. *et al.* Enhancing both motor and cognitive functioning in Parkinson's disease: Aerobic exercise as a rehabilitative intervention. *Brain Cogn.* **99**, 68–77 (2015).
7. Ferraz, D. D. *et al.* The Effects of Functional Training, Bicycle Exercise, and Exergaming on Walking Capacity of Elderly Patients With Parkinson Disease: A Pilot Randomized Controlled Single-blinded Trial. *Arch. Phys. Med. Rehabil.* **99**, 826–833 (2018).
8. Fiorelli, C. M. *et al.* Differential acute effect of high-intensity interval or continuous moderate exercise on cognition in individuals with Parkinson's disease. *J. Phys. Act. Heal.* **16**, 157–164 (2019).
9. Harper, S. A., Dowdell, B. T., Kim, J. H., Pollock, B. S. & Ridgel, A. L. Non-motor symptoms after one week of high cadence cycling in Parkinson's disease. *Int. J. Environ. Res. Public Health* **16**, (2019).
10. Hazamy, A. A. *et al.* Improved cognition while cycling in Parkinson's disease patients and healthy adults. *Brain Cogn.* **113**, 23–31 (2017).
11. McGough, E. L. *et al.* A tandem cycling program: Feasibility and physical performance outcomes in people with Parkinson disease. *J. Neurol. Phys. Ther.* **40**, 223–229 (2016).
12. Nadeau, A. *et al.* A 12-week cycling training regimen improves gait and executive functions concomitantly in people with parkinson's

disease. *Front. Hum. Neurosci.* **10**, 1–10 (2017).

13. Nadeau, A. *et al.* A 12-Week Cycling Training Regimen Improves Upper Limb Functions in People With Parkinson's Disease. *Front. Hum. Neurosci.* **12**, 1–11 (2019).
14. Peacock, C. A. *et al.* Introducing a multifaceted exercise intervention particular to older adults diagnosed with parkinson's disease: A preliminary study. *Aging Clin. Exp. Res.* **26**, 403–409 (2014).
15. Qutubuddin, A. *et al.* Parkinson's Disease and Forced Exercise: A Preliminary Study. *Rehabil. Res. Pract.* **2013**, 1–5 (2013).
16. Ridgel, A. L., Muller, M. D., Kim, C. H., Fickes, E. J. & Mera, T. O. Acute effects of passive leg cycling on upper extremity tremor and bradykinesia in Parkinson's disease. *Phys. Sportsmed.* **39**, 83–93 (2011).
17. Ridgel, A. L., Kim, C. H., Fickes, E. J., Muller, M. D. & Alberts, J. L. Changes in executive function after acute bouts of passive cycling in Parkinson's disease. *J. Aging Phys. Act.* **19**, 87–98 (2011).
18. Ridgel, A. L., Peacock, C. A., Fickes, E. J. & Kim, C. H. Active-assisted cycling improves tremor and bradykinesia in Parkinson's disease. *Arch. Phys. Med. Rehabil.* **93**, 2049–2054 (2012).
19. Steib, S. *et al.* A Single Bout of Aerobic Exercise Improves Motor Skill Consolidation in Parkinson's Disease. *Front. Aging Neurosci.* **10**, (2018).
20. Tabak, R., Aquije, G. & Fisher, B. E. Aerobic exercise to improve executive function in Parkinson disease: A case series. *J. Neurol. Phys. Ther.* **37**, 58–64 (2013).
21. Tollar, J., Nagy, F. & Hortobágyi, T. Vastly Different Exercise Programs Similarly Improve Parkinsonian Symptoms: A Randomized Clinical Trial. *Gerontology* **65**, 120–127 (2019).
22. Uygur, M. *et al.* Immediate effects of high-speed cycling intervals on bradykinesia in Parkinson's disease. *Physiother. Theory Pract.* **31**, 77–82 (2015).
23. Uygur, M., Bellumori, M. & Knight, C. A. Effects of a low-resistance, interval bicycling intervention in Parkinson's Disease. *Physiother. Theory Pract.* **33**, 897–904 (2017).
